# Supplementary material for: The circular RNA circHMGB2 drives immunosuppression and anti-PD-1 resistance in lung adenocarcinomas and squamous cell carcinomas via the miR-181a-5p/CARM1 axis
Source: PubMed Central journal article supplement (PMC9077876; doi:10.1186/s12943-022-01586-w), 2022-05-07

Figure S1

A

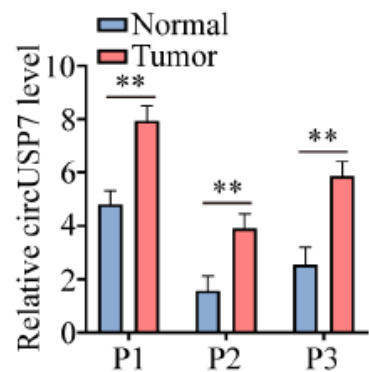

B

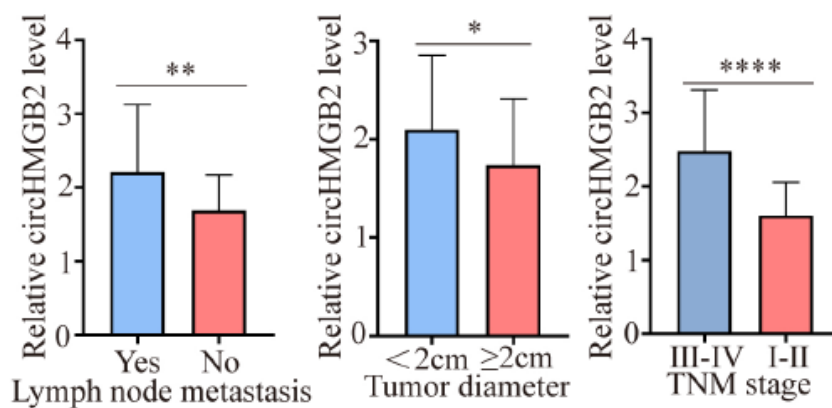

C

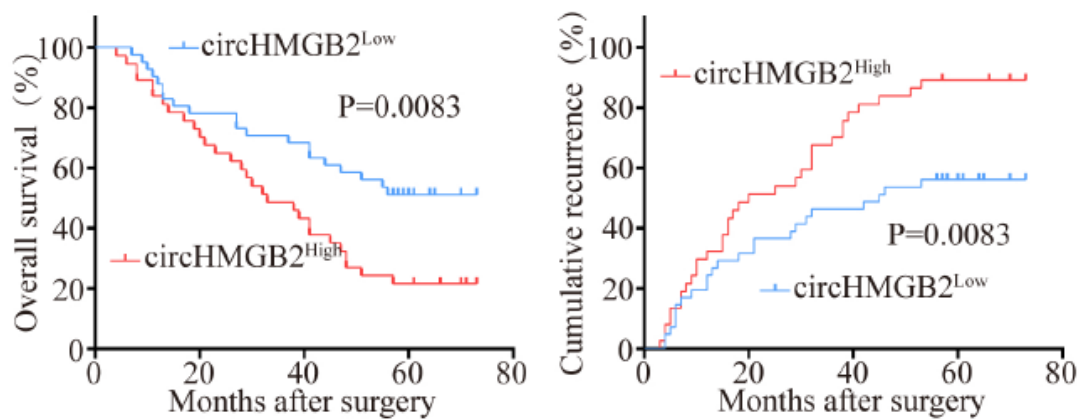

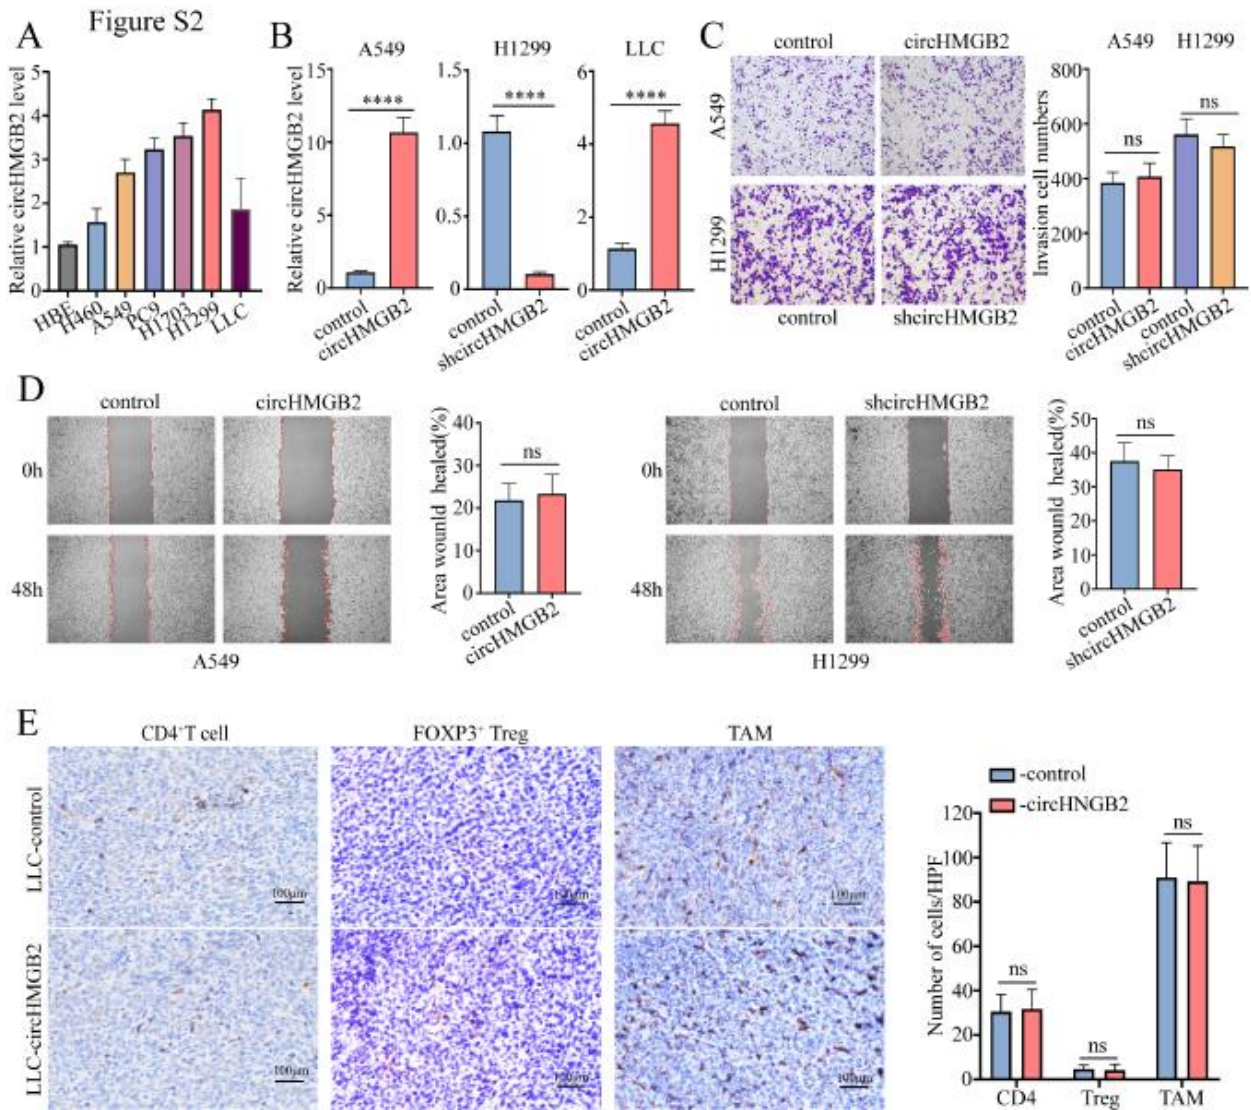

Figure S3

A

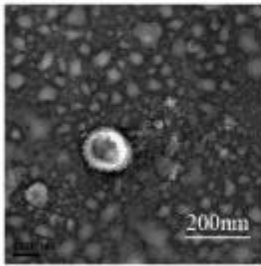

B

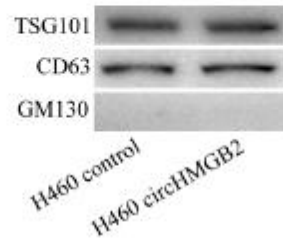

C

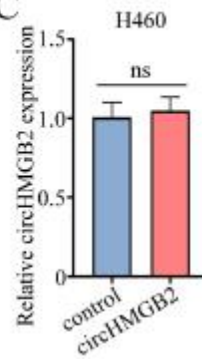

Figure S4

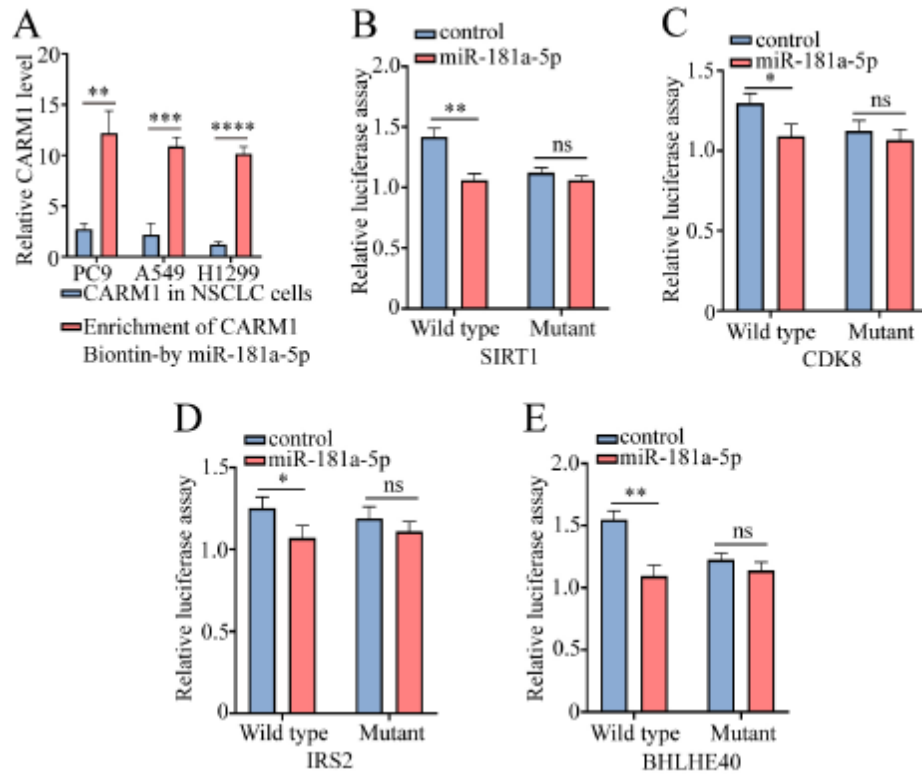

Figure S5

A

hsa-miR-181a-5p 5' - **aacauucaacgcugucgugagu** - 3'  
 |||||  
 mmu-miR-181a-5p 5' - **aacauucaacgcugucgugagu** - 3'

B

Carm1 5' guUCACC - UCAAACUUGAAUGUa 3'  
 |||||    ||    |||||  
 mmu-miR-181a-5p 3' ugAGUGGCUGUCGCAACUACAa 5'  
 |||||    ||    |||||  
 mu Carm1 5' guUCACC - UCAAAC**ACUACA**a 3'

C

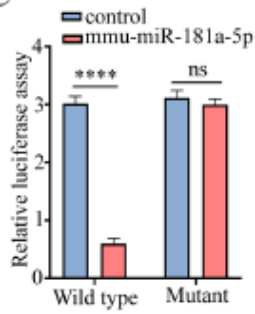

D

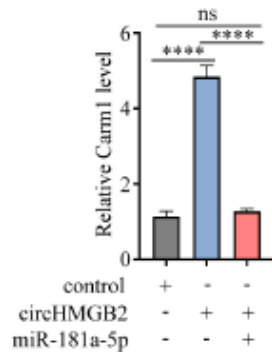

E

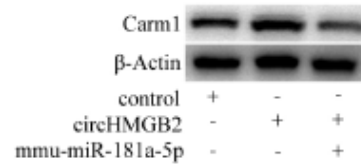

Figure S6

A

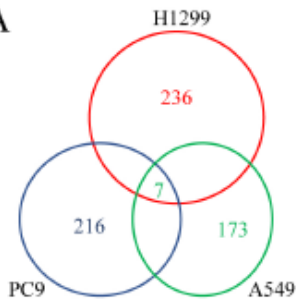

| Accession | Description                                                |
|-----------|------------------------------------------------------------|
| Q86X55    | Coactivator-associated arginine methyltransferase 1, CARM1 |
| O15379    | Histone deacetylase 3, HDAC3                               |
| P35579    | Myosin-9, MYH9                                             |
| P06899    | Histone H2B type 1, J H2B1J                                |
| O00571    | ATP-dependent RNA helicase DDX3X, DDX3X                    |
| P07355    | Annexin A2, ANXA2                                          |
| P17987    | T-complex protein 1 subunit alpha, TCPA                    |

B

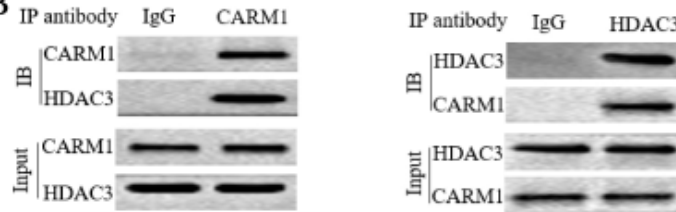

C

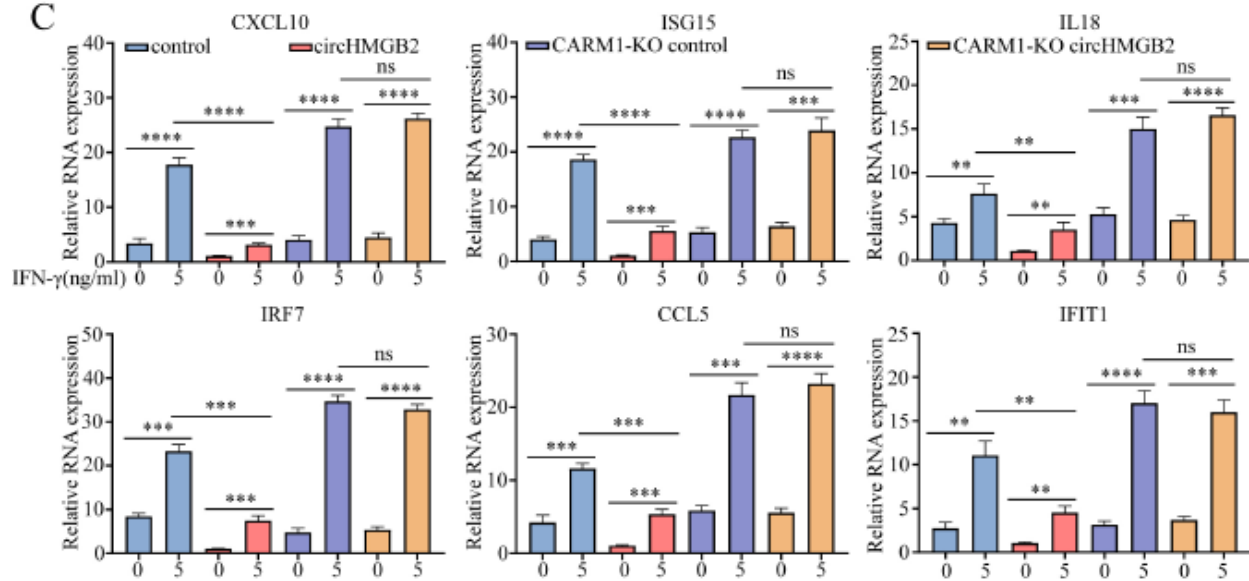

Supplement: 12943_2022_1586_MOESM2_ESM.pdf [file 12943_2022_1586_MOESM2_ESM.pdf]
